# Supplementary material for: ISWI1 complex proteins facilitate developmental genome editing inParamecium
Source: HighWire-hosted journal article supplement (doi:10.1101/gr.278402.123), 2024-11-14
Supplement: Supplemental_Tables_S1-S10.docx [file Supplemental_Tables_S1-S10.docx]

**Supplemental Table S1: Predicted interaction in AlphaFold2 models**

| AF2 version | model | interaction predicted | GxD involved | interaction interface |
| --- | --- | --- | --- | --- |
| v2.2.0 | ISWIN + ICOPa | yes | no | ICOPa resi 556-597; ISWI1 resi 425-426+431+434-437+474+477-478+481 |
|  | ISWIN + ICOPb | yes | no | ICOPb resi 560-603; ISWI1 resi 425-426+431+434-437+474+477-478+481 |
|  | ISWIC + ICOPa | no | - | - |
|  | ISWIC + ICOPb | no | - | - |
|  | ISWI1 + ICOPa | no | - | - |
|  | ISWI1 + ICOPb | no | - | - |
|  | ICOPA + ICOPb | no | - | - |
|  | ISWIN + ICOPA/B | no | - | - |
|  | ISWIN + Ptiwi01 | no | - | - |
|  | ISWIC + Ptiwi01 | yes | - | - |
| v2.3.0 | ISWIN + ICOPa | yes | no | large interaction interface |
|  | ISWIN + ICOPb | yes | no | large interaction interface |
|  | ISWIC + ICOPa | yes | no | large interaction interface |
|  | ISWIC + ICOPb | yes | no | large interaction interface |
|  | ISWI1 + ICOPa | yes | no | mostly ISWI1 N-terminus |
|  | ISWI1 + ICOPb | yes | no | mostly ISWI1 N-terminus |
|  | ICOPA + ICOPb | yes | - | - |

Predicted interactions between multimers with AlphaFold2. ISWI1 was either predicted as full length (ISWI1) or split version (ISWIN or ISWIC, referring to N-terminus and C-terminus, respectively). All other proteins were provided as full length. For detailed input sequences refer to Supplemental Table 4.

**Supplemental Table S2: Percentage of alternatively excised IESs**

|  | including IES with 100% alternative excision | | | excluding IES with 100% alternative excision | | |
| --- | --- | --- | --- | --- | --- | --- |
|  | median | mean | IESs | median | mean | IESs |
| *CTRL*-KD | 0.00 % | 2.59 % | 41311 | 0.00 % | 1.09 % | 40680 |
| *ISWI1*-KD | 4.55 % | 10.86 % | 43983 | 4.35 % | 9.18 % | 43171 |
| *ICOPa*-KD | 0.00 % | 8.97 % | 42237 | 0.00 % | 7.01 % | 41349 |
| *ICOPb*-KD | 0.00 % | 6.00 % | 41573 | 0.00 % | 4.18 % | 40785 |
| *ICOPa/b*-KD | 0.00 % | 6.53 % | 41767 | 0.00 % | 4.71 % | 40972 |

Median and mean percentage (in %) of alternative excision for all IESs in the KDs. The number of IESs included in the analysis is given (“IESs”). IESs with 100% alternative excision are either included (left) or excluded (right).

**Supplemental Table S3: Length differences in partial external and partial internal alternative excision**

|  | partial external  -(reference length – alternative length) | | | | partial internal  (reference length – alternative length) | | | |
| --- | --- | --- | --- | --- | --- | --- | --- | --- |
|  | min | max | mean | median | min | max | mean | median |
| *CTRL*-KD | 1 | 4933 | 88,29 | 8 | 3 | 3272 | 62,15 | 7 |
| *ISWI1*-KD | 1 | 9538 | 78,82 | 8 | 3 | 4357 | 21,80 | 11 |
| *ICOPa*-KD | 1 | 8148 | 110,81 | 5 | 3 | 2394 | 15,62 | 10 |
| *ICOPb*-KD | 1 | 7701 | 52,06 | 4 | 3 | 2049 | 15,66 | 10 |
| *ICOPa/b*-KD | 1 | 9586 | 125,17 | 4 | 3 | 3056 | 26,57 | 11 |

Length differences of alternatively excised fragment to the IES reference length in partial external (left) and partial internal (right) alternative excision events in the KDs.

**Supplemental Table S4: Means of nucleosome density differences**

| IES group | IRS in ICOPa/b-KD | IES length | ICOPa_b | ISWI1 | NOWA1_2 | PtCAF1 |
| --- | --- | --- | --- | --- | --- | --- |
| total | all | all | -0.03 0.78 | -0.02 1.17 | 0.03 1.69 | -0.04 1.45 |
| low | < 0.2 | all | -0.07 0.77 | 0.00 1.07 | 0.07 1.75 | -0.12 1.43 |
| high | >= 0.2 | all | 0.15 0.81 | -0.09 1.50 | -0.14 1.40 | 0.30 1.48 |
| short | all | < 200 bp | -0.04 0.79 | -0.01 1.02 | 0.03 1.72 | -0.05 1.44 |
| long | all | >= 200 bp | 0.29 0.39 | -0.09 2.88 | 0.00 0.92 | 0.17 1.75 |
| low_short | < 0.2 | < 200 bp | -0.08 0.78 | 0.01 0.86 | 0.07 1.77 | -0.13 1.40 |
| low_long | < 0.2 | >= 200 bp | 0.24 0.38 | -0.15 3.74 | 0.06 1.04 | 0.09 2.19 |
| high_short | >= 0.2 | < 200 bp | 0.13 0.84 | -0.10 1.57 | -0.15 1.46 | 0.31 1.54 |
| high_long | >= 0.2 | >= 200 bp | 0.35 0.41 | -0.01 0.49 | -0.09 0.71 | 0.28 0.78 |

**Supplemental Table S5: Primers used for IES Retention PCR analysis**

| IES | Primer sequence (5’ to 3’ orientation) |
| --- | --- |
| MT Locus F | GGTGTTTATATCTTAATTGTTGACCCTCAC |
| MT Locus R | CCATCTATACTCCATTCTTTATCTTAATTCAT |
| 51A2591F | ATGTGTTTGGACTGGATTGGCATGTAGAAG |
| 51A2591R | GATGTAGCATAACATTTATCAACAATCCAT |
| 51A6649F | ACTGCACCTCTAACTTTAACAAGCGAAGCA |
| 51A6649R | CAGCAGTACATCCAGCTCTCTAAGTTTAGC |

**Supplemental Table S6: Reads used for adapter trimming**

| Read 1 | AGATCGGAAGAGCACACGTCTGAACTCCAGTCA |
| --- | --- |
| Read 2 | AGATCGGAAGAGCGTCGTGTAGGGAAAGAGTGT |

**Supplemental Table S7: Changes to the lib/PARTIES/Map.pm file**

| old line | system("$bowtie2 --threads $self->{THREADS}  --quiet --local -x $self->{BT2_INDEX} -1 $self->{FASTQ1} -2 $self->{FASTQ2} -X $self->{MAX_INSERT_SIZE} | $samtools view -uS - | $samtools sort - -o $out_bam > /dev/null 2>&1"); |
| --- | --- |
| new line | system("$bowtie2 --threads $self->{THREADS}  --quiet --local -x $self->{BT2_INDEX} -1 $self->{FASTQ1} -2 $self->{FASTQ2} -X $self->{MAX_INSERT_SIZE} | $samtools view - -uS | $samtools sort - -o notneeded.bam > $out_bam "); |

**Supplemental Table S8: Input Sequences for AlphaFold2 modeling**

| ISWI1 full length | MSNQSDDENEVLQVELASDEEQRAEEEDERIKKLEQDKKSFMSQIKSTGRMNTNIKFDNIESKINTLLENAEKYAMFLLHRHKRTQESKQKVQGQQRGKHRQIVEDGSEEEDFDDTPTVLEKQPTILKGGQLKSYQLTGLNWMISLFEEGINGILADEMGLGKTIQTIGFLAFLKEYKKISGPYLIVAPKSTLGNWMREFKIWMPCMRVVKLIAIKEERDEILNRYFQPGKFDVCLTSYEGVNICLKHIRRFQYKYIIIDEAHKIKNEDAIISQNLRKIRTNYKLLLTGTPLQNTPHELWSLLNYLLPDLFDSSEVFDKWFEVNTEAKLKEGNETIHQDELEQRNLEMVQKFQKILRPFMLRRTKAEVERMLPPKQEIHLFIKMSNLQKSMYQNILIHNNPHEGDDKGFYMNKLMQLRKICLHPYLFPEVEDKSLPALGEHLVDVSGKMRVLDKFLQKLSEGQHQILIFSQFTMMLNILEDYCNFRGYEYCRIDGETEIQSRDDQIAEFTAPDSKKFIFLLSTRAGGLGINLATADTVIIYDSDFNPQMDMQAMDRAHRIGQKSRVMVYRMACEHTVEEKIIERQQIKLRWDSLMVQQGRLQQKQNGKLLSKEDLKELTTYGASQIFKLDGDDIKDEDIDILLKRGEQLTKEMNERIEKKFENFKDKVQSLDLGLGQINIFDYFDEAKRNKEDEDALEDALVNHLMQDNKTRNRDKRAMMIGTNSKKIQGKQIKLSEHHLYENKDRLQYLLQKEEDFLAQQKTQKKANENDENVDFGGLTQDERQEQKRLLETGFKNWNKQEFQDFITANEKYGKDAYEKIQEVIKTKSQDEVKAYAQAFWERIDGLSEKDKIVKQIERGQKLIEQKTNGQKLIEEKCKHFHQPKYELVFTPQLYNKFKSKYFSLENDKFLIYMTNEVGYGNWAQLKQSIRKEPMFRFDHAFKCKSENELKNRVISLVKVLDKEKENNSMGRSLVKNTYIEKPKVLQESQKKKAKNDEEDVQDGSESVKKVKV |
| --- | --- |
| ISWI1 N-terminus | MSNQSDDENEVLQVELASDEEQRAEEEDERIKKLEQDKKSFMSQIKSTGRMNTNIKFDNIESKINTLLENAEKYAMFLLHRHKRTQESKQKVQGQQRGKHRQIVEDGSEEEDFDDTPTVLEKQPTILKGGQLKSYQLTGLNWMISLFEEGINGILADEMGLGKTIQTIGFLAFLKEYKKISGPYLIVAPKSTLGNWMREFKIWMPCMRVVKLIAIKEERDEILNRYFQPGKFDVCLTSYEGVNICLKHIRRFQYKYIIIDEAHKIKNEDAIISQNLRKIRTNYKLLLTGTPLQNTPHELWSLLNYLLPDLFDSSEVFDKWFEVNTEAKLKEGNETIHQDELEQRNLEMVQKFQKILRPFMLRRTKAEVERMLPPKQEIHLFIKMSNLQKSMYQNILIHNNPHEGDDKGFYMNKLMQLRKICLHPYLFPEVEDKSLPALGEHLVDVSGKMRVLDKFLQKLSEGQHQILIFSQFTMMLNILEDYCNFRGYEYCRIDGETEIQSRDDQIAEFTAPDSKKFIFLLSTRAGGLGINLATADTVIIYDSDFNPQMDMQAMDRAHRIGQKSRVMVYRMACEHTVEEKIIERQQIKLRWDSLMVQQGRLQ |
| ISWI1 C-terminus | QKQNGKLLSKEDLKELTTYGASQIFKLDGDDIKDEDIDILLKRGEQLTKEMNERIEKKFENFKDKVQSLDLGLGQINIFDYFDEAKRNKEDEDALEDALVNHLMQDNKTRNRDKRAMMIGTNSKKIQGKQIKLSEHHLYENKDRLQYLLQKEEDFLAQQKTQKKANENDENVDFGGLTQDERQEQKRLLETGFKNWNKQEFQDFITANEKYGKDAYEKIQEVIKTKSQDEVKAYAQAFWERIDGLSEKDKIVKQIERGQKLIEQKTNGQKLIEEKCKHFHQPKYELVFTPQLYNKFKSKYFSLENDKFLIYMTNEVGYGNWAQLKQSIRKEPMFRFDHAFKCKSENELKNRVISLVKVLDKEKENNSMGRSLVKNTYIEKPKVLQESQKKKAKNDEEDVQDGSESVKKVKV |
| ICOPa | MDNKENEKQAKLKEFQRRFPNYMNGKKVIFPIMDEIIVQFSQIFPQSNQFGKMREGNVIKTFSPIPLNQQIEITTFINAFPYNQQFAAMSDSQNQFQLLLSPLLKLTGHLIKDYHTNATFSNSYQYSTFDTQEQSDRINFKLAAFIVEDIFKYKMGLLKPIDIAKQRQVKDEIKKKGNKPQKMSLLSIVEKQQEEEKDLNQDLTIQSQKYEFENYLDPTCQFFWKIAYESFNKIIKKSQRTKLQDMDIEQDSDEQPETIQNVNKETLSQDNIEMRRQQIISKYQQLCKLKDQSKKKSKQTKQYSQIKSFKIKDRYTDLEMLRFNNLFKFLVQNWPSFLLQSIKLPYVQSLFTDQELRNIKSIGQNELGYFGLKAKQRADITSNLIEGVRETDSFKVIIEYRQEVTEAVGLVLENVQDELNSINQSLQKKDSQYTQQQQQQYRKVYKQYLQLVEFNRLFINGCLYLGSDIHGFDYHIFSNDIDHIYQNNGSEWRVLDENQVQQLFKTLNVCGVKERELQTNIQKLMACELFNDQETKELITIKNVEQSQVQAGNRSPKQLIVKILLEVVQKYTDILMVRKLRWESYKIREKFQNTIKTLENPLDMVDFMKILIEQFETAQVLIIDQQKMQNGSQYDQRDLKEFQQRLRIYENKLKGLKEPEKILFYDTQLFQMMESREHIKPNGVKCNTKFWQQSLGLEVKEALMNFANKVDKEHQQYDVVFMASTLLLAVQEYELSSSAQDNEDDELLRQIVKDVKVDNSNFPSKIDNHQKNNQIIELD |
| ICOPb | MDNKENEKQAKLKEFQRRFPNYMNGKKVIFPIMDEIIVQFSQIFPQSNQFGKMREGNVIKTFSPIPLNQQIEITTFINAFPYNQQFAAMSDSQNQFQLLLSPLLKLTGHLIKDYHSNATFSNSYQYSTFDTQEQSDRINFKLTAFIIEDIFKYKMGLLKPIDIAKQRQVKDDIKKKANKAQKISLLTMVEKQQQQEEEKDVNQDLTLQSQKYEFENYLDPTCQSFWKIAYEAFNKIIKKSQRTKLQDMDIEQESDEQPDTIQNVNNQKGNLNQESIELRRQQIISKYQQLGKLKDQNKKKSKSTKQYTQIKSFKIKDKYTDLEMLRFNNLFKFLIQNWPAMLLQSIKLPYVQSLFNDQELRNIKSIGQNDLGYFGLKAKQRADITSNLIEGVRETDSFKIIIEYRQEVTEAVGLVLENVQDELNSINQALQKKDSQYTLQQQQQYRKIYKQYLQLVEFSRLFINGCLYLGSDIHGYDYHIFSNDIDHIYQNNGSEWRVLDENQVQQLFKTLNVCGVKERELQTNIQKLMACELFNDQDTKELITIKNVEQSQVQAGNRSPKQLIVKILLEVVQKYTDTLMIRKLRWESYKIREKFQNTIKTLENPLDMVDFMKILIEQFETAQVLVIDQQKMQNGNQYDQKDLKEFQQRIRIYENKLQGLKEPEKILFYDSQLFQLMESKEYIKPNGIKSNTKFWQQSLGVEVKEALMNFANKVDKENQQYDVVFMASTLLLAVQEYELSSSSQDNEDDELLRQIVKEVKFDNQNLLLKTDNHQVNNQIIELD |
| Ptiwi01 | MFQNIQLKANFHEMRLNPSRPVYQYKLEITDSSPEKVSEALKKFRPQLQTQLILFMSLNQNIYSPKLIQEADNGLVLGSLSGNETNQDTATLKLVGKIENKADLNIIISRLFKQVIRSQMQMVSVGNKGQKLFWSSRAQQFKDQNLEIWPGVECIFRPGEGGAQNPTLVIDCAFKMLRYRSALEELNQTRNPACIQDQIVMTTYNKKFYKVEAVDVNLKPASTFTNEKGETISFAQYYEQRYKVKVDGNQPLIRATVRSKQDKTEKTIHLIPQLCQLTGLTDAIRNDFNAMKNLAVVTKPGADQRMKMAQEFANQLASTEIVNKKLGTKRQIFKEWGVEINPGSMDVPARRIHPGNMLMGNGLKLDLSSPQTNLDRQTQTQMFSTPPQQLILGIIYNKKTGQQTMDSLMQNFQAACNDFKFQAFMAPKVFPIEQDRDEDLERVLDGFQKQAEANKAKVGFLLFLLPGQKKKARLYKTAKKISMQKFGCASQVVVEKTLAKNTRSIVNKILIQLNAKVGGTPWAIDSLPTTFQNQPTMICGTDCFVKSGRKNQLAFCSTVDRNLSRYYSQVVTSGEFSQHLQQVFKASLLAFKEQNGIFPKLIIIYRDGVGDGQQAVVLANELPQYKQALEELQITDTKISLVVCNKRVSAKFYTGGNARPDNPQPGTCVDNPKVVEQSNPNFYLISQVTRQGTVTPSLYKIIHSDQAGLDDDIKVLTFKLCWLFYNFTGSIKIPAPVRYAHCLCNFIGDNYDDRDQVKFLPLPDLVKQKVLFYI |

**Supplemental Table S9: Codon-optimized sequences for recombinant protein expression**

| ISWI1 | ATG TCA AAT CAG TCT GAT GAT GAA AAT GAG GTC CTC CAA GTC GAA CTG GCC TCT GAC GAA GAA CAA CGT GCA GAA GAA GAA GAT GAA CGG ATT AAG AAA CTG GAA CAG GAC AAA AAA TCT TTC ATG TCA CAG ATC AAA TCG ACT GGC CGG ATG AAC ACG AAT ATC AAG TTT GAC AAC ATT GAA AGT AAG ATC AAT ACT CTC CTG GAG AAT GCG GAG AAA TAT GCG ATG TTC CTG CTT CAT CGT CAC AAA CGG ACG CAG GAA TCG AAA CAG AAA GTG CAG GGG CAG CAA CGC GGC AAA CAT CGC CAG ATT GTG GAA GAT GGG TCT GAA GAA GAG GAT TTT GAC GAC ACG CCT ACT GTA CTG GAG AAG CAA CCG ACC ATT CTG AAA GGC GGA CAG TTG AAG TCG TAC CAG TTA ACG GGT CTG AAT TGG ATG ATT TCG TTG TTT GAA GAA GGC ATT AAC GGC ATC TTA GCC GAT GAA ATG GGT CTG GGC AAG ACG ATC CAA ACA ATT GGT TTT CTG GCT TTT CTG AAA GAA TAC AAG AAA ATC TCT GGT CCA TAC CTG ATT GTT GCA CCG AAA AGC ACG CTC GGC AAT TGG ATG CGT GAA TTC AAA ATC TGG ATG CCG TGT ATG CGC GTC GTT AAA CTG ATC GCC ATC AAA GAA GAA CGC GAC GAA ATT CTG AAT CGC TAT TTC CAG CCA GGG AAA TTT GAT GTG TGT CTG ACC AGC TAT GAA GGC GTG AAC ATT TGT CTG AAG CAC ATT CGC CGT TTT CAG TAC AAG TAT ATC ATC ATT GAT GAA GCG CAC AAA ATT AAG AAC GAG GAT GCG ATT ATT AGC CAG AAC CTG CGC AAA ATT CGT ACC AAC TAC AAG TTA CTG CTG ACG GGT ACA CCT CTG CAG AAC ACT CCT CAT GAG CTG TGG TCA CTT CTG AAC TAC CTT CTG CCG GAT CTT TTT GAT AGC AGC GAG GTG TTT GAT AAG TGG TTC GAA GTA AAC ACC GAA GCC AAA TTG AAA GAA GGC AAT GAG ACA ATC CAT CAG GAC GAA TTA GAA CAG CGC AAC CTG GAA ATG GTC CAA AAA TTC CAG AAA ATT CTG CGC CCC TTC ATG CTG CGT CGC ACA AAG GCT GAG GTA GAA CGC ATG CTG CCA CCG AAA CAG GAA ATT CAT CTG TTC ATC AAG ATG TCC AAC TTG CAA AAA AGT ATG TAT CAG AAC ATT CTG ATC CAC AAT AAC CCG CAC GAA GGT GAT GAT AAA GGG TTT TAC ATG AAC AAG CTT ATG CAG TTA CGC AAA ATC TGC TTA CAC CCC TAT CTG TTC CCG GAG GTT GAG GAT AAA AGC CTG CCG GCG CTC GGT GAG CAT CTT GTG GAT GTT AGC GGT AAA ATG CGG GTG TTG GAT AAA TTT CTT CAA AAA CTG AGC GAA GGT CAA CAT CAG ATT CTC ATC TTT TCC CAG TTT ACT ATG ATG CTC AAC ATT CTG GAG GAT TAC TGC AAT TTT CGC GGC TAT GAA TAT TGC CGC ATT GAC GGA GAA ACC GAA ATC CAG AGT CGT GAC GAT CAG ATT GCG GAA TTT ACG GCT CCG GAC TCT AAG AAA TTC ATT TTC CTG CTG TCA ACC CGT GCT GGA GGA TTG GGC ATC AAT CTG GCG ACA GCG GAT ACC GTC ATC ATC TAT GAT TCG GAT TTC AAC CCG CAA ATG GAT ATG CAG GCA ATG GAC CGC GCT CAT CGC ATT GGC CAG AAA AGC CGC GTC ATG GTG TAT CGT ATG GCT TGT GAA CAT ACC GTG GAA GAG AAA ATC ATT GAA CGC CAG CAG ATC AAA TTG CGT TGG GAC TCA TTG ATG GTT CAG CAA GGT CGC TTA CAA CAG AAA CAG AAC GGA AAG CTC CTT TCC AAA GAA GAT CTG AAA GAA TTA ACC ACT TAC GGT GCC TCC CAG ATC TTT AAA CTG GAT GGC GAT GAC ATT AAA GAT GAA GAT ATC GAC ATT CTG CTG AAA CGT GGG GAG CAA CTG ACC AAA GAA ATG AAT GAA CGC ATT GAG AAA AAG TTC GAA AAC TTC AAG GAT AAA GTA CAG TCA CTC GAT CTG GGC TTG GGG CAA ATT AAC ATC TTT GAC TAT TTC GAT GAA GCC AAA CGT AAT AAG GAG GAC GAA GAT GCG CTG GAG GAT GCC TTA GTC AAC CAT CTG ATG CAG GAT AAT AAA ACC CGT AAT CGT GAC AAA CGG GCA ATG ATG ATT GGC ACC AAC AGC AAG AAG ATT CAA GGT AAA CAG ATT AAG CTG TCC GAA CAC CAT TTA TAT GAG AAC AAA GAC CGC CTG CAA TAC TTG CTG CAA AAA GAA GAA GAT TTC TTA GCC CAG CAG AAA ACG CAG AAA AAA GCG AAT GAA AAC GAT GAG AAT GTG GAC TTT GGT GGC CTG ACC CAG GAT GAA CGT CAA GAG CAG AAA CGC TTG TTA GAA ACG GGG TTT AAA AAT TGG AAC AAA CAG GAA TTT CAA GAC TTC ATT ACC GCG AAC GAA AAA TAT GGT AAA GAT GCC TAT GAG AAA ATT CAA GAG GTG ATT AAA ACG AAA TCC CAA GAT GAG GTT AAG GCA TAT GCA CAG GCG TTT TGG GAA CGC ATT GAT GGC TTA AGT GAA AAA GAC AAA ATC GTC AAA CAG ATT GAA CGT GGT CAG AAA CTG ATT GAA CAG AAA ACC AAC GGT CAG AAA CTC ATC GAA GAA AAA TGC AAA CAC TTC CAC CAA CCG AAA TAC GAG TTG GTT TTT ACC CCA CAA CTC TAT AAC AAA TTT AAA TCC AAA TAT TTT AGT CTG GAG AAT GAC AAA TTC TTG ATT TAC ATG ACC AAT GAA GTT GGC TAT GGC AAT TGG GCA CAG CTT AAA CAA AGT ATT CGT AAA GAG CCG ATG TTC CGC TTT GAC CAT GCG TTT AAA TGC AAA AGC GAA AAC GAG CTG AAA AAT CGC GTT ATC AGC CTT GTG AAA GTA CTG GAC AAA GAA AAG GAA AAC AAC AGC ATG GGT CGT AGT CTG GTG AAG AAT ACT TAC ATC GAG AAA CCC AAA GTA CTG CAA GAA TCG CAA AAG AAA AAA GCC AAA AAT GAC GAA GAG GAT GTT CAG GAT GGC TCT GAA TCG GTG AAA AAA GTC AAA GTG |
| --- | --- |
| ICOPa | ATG GAT AAT AAA GAA AAC GAA AAA CAA GCC AAA CTC AAA GAA TTT CAG CGC CGC TTT CCG AAT TAT ATG AAT GGC AAA AAA GTG ATC TTT CCG ATT ATG GAT GAG ATC ATT GTG CAG TTC TCG CAG ATT TTC CCT CAG TCG AAT CAG TTC GGT AAA ATG CGC GAA GGC AAC GTA ATC AAA ACC TTC AGC CCG ATT CCA CTG AAT CAG CAG ATT GAG ATC ACG ACC TTT ATC AAT GCG TTT CCG TAT AAT CAG CAG TTT GCC GCT ATG TCC GAT AGC CAG AAC CAG TTT CAG CTT TTA CTG AGT CCG TTA CTG AAA CTG ACT GGC CAT TTA ATC AAA GAC TAT CAC ACG AAT GCC ACA TTC AGC AAC TCA TAC CAA TAT TCG ACC TTT GAT ACC CAA GAA CAA AGC GAT CGG ATT AAC TTC AAA TTA GCA GCC TTC ATT GTG GAA GAT ATT TTC AAA TAC AAG ATG GGC TTG CTG AAA CCG ATT GAC ATC GCC AAA CAG CGG CAA GTG AAA GAC GAG ATT AAG AAA AAA GGG AAC AAA CCC CAG AAA ATG AGC CTG CTG TCC ATT GTA GAA AAA CAA CAA GAG GAA GAA AAG GAC CTG AAT CAG GAC CTG ACA ATT CAA AGC CAG AAA TAC GAG TTT GAA AAC TAC CTG GAT CCG ACA TGT CAG TTC TTT TGG AAA ATT GCG TAC GAG AGT TTC AAC AAA ATC ATC AAA AAG TCC CAG CGC ACC AAA TTG CAA GAC ATG GAT ATT GAA CAG GAT AGC GAT GAA CAA CCA GAA ACG ATC CAG AAT GTG AAC AAA GAG ACT CTG TCC CAG GAC AAC ATT GAG ATG CGT CGT CAG CAG ATC ATC TCG AAA TAC CAA CAA CTG TGC AAA CTG AAA GAT CAG TCA AAG AAA AAA TCC AAA CAG ACG AAA CAG TAT TCT CAG ATT AAA AGT TTC AAG ATC AAA GAT CGT TAC ACT GAC CTT GAA ATG CTG CGT TTC AAC AAC CTT TTC AAA TTT CTC GTA CAG AAC TGG CCG TCA TTT CTG CTG CAA AGT ATC AAA CTG CCA TAT GTG CAG TCT CTG TTT ACT GAT CAA GAA CTC CGC AAC ATT AAG TCC ATC GGT CAG AAC GAA CTG GGC TAT TTT GGC TTA AAA GCC AAA CAG CGT GCT GAC ATT ACT AGC AAC CTG ATT GAA GGA GTG CGT GAA ACC GAT TCT TTT AAG GTG ATT ATT GAG TAT CGC CAA GAA GTC ACC GAA GCT GTT GGT CTG GTT CTG GAA AAC GTT CAA GAT GAA CTG AAT AGC ATC AAC CAA TCT CTG CAG AAA AAA GAC AGC CAG TAT ACC CAG CAA CAA CAA CAG CAG TAC CGC AAG GTG TAT AAG CAG TAC CTT CAA CTC GTT GAG TTT AAT CGC CTG TTT ATT AAC GGG TGC TTG TAT CTG GGT TCG GAC ATC CAT GGC TTC GAC TAT CAC ATT TTT TCC AAC GAC ATT GAC CAT ATC TAC CAA AAT AAC GGC TCT GAA TGG CGT GTT CTG GAT GAG AAT CAG GTT CAG CAA CTT TTT AAG ACC TTA AAT GTC TGT GGT GTA AAA GAA CGT GAA CTG CAG ACC AAC ATT CAG AAA CTG ATG GCG TGT GAG CTC TTT AAT GAT CAG GAA ACG AAA GAA TTG ATT ACG ATC AAG AAC GTC GAA CAA AGT CAG GTT CAA GCA GGG AAT CGC AGC CCT AAA CAG CTC ATT GTC AAA ATC CTG CTG GAA GTG GTA CAG AAA TAC ACC GAC ATT CTG ATG GTT CGT AAG TTA CGC TGG GAA TCG TAT AAA ATT CGG GAG AAA TTC CAG AAC ACC ATC AAG ACC CTG GAA AAT CCG CTG GAT ATG GTG GAT TTC ATG AAA ATT CTG ATT GAA CAG TTT GAG ACA GCG CAA GTT CTC ATT ATC GAT CAG CAA AAG ATG CAG AAT GGC AGC CAG TAC GAT CAA CGC GAT TTA AAG GAG TTC CAG CAA CGT TTG CGC ATT TAC GAG AAC AAA TTG AAA GGT CTT AAA GAA CCG GAA AAA ATC TTG TTC TAT GAT ACC CAA CTC TTT CAG ATG ATG GAA AGT CGC GAA CAT ATC AAA CCC AAC GGA GTT AAA TGC AAC ACG AAG TTC TGG CAG CAA TCT TTA GGT TTG GAA GTG AAA GAA GCG TTG ATG AAT TTT GCG AAT AAA GTC GAC AAG GAA CAT CAG CAG TAT GAT GTA GTG TTT ATG GCG TCT ACG TTA CTG CTG GCA GTC CAG GAG TAT GAG CTG TCA TCA AGT GCA CAG GAC AAT GAG GAT GAC GAA CTT CTT CGC CAA ATC GTC AAA GAT GTG AAA GTC GAT AAC AGC AAC TTT CCT TCG AAA ATT GAT AAT CAC CAG AAG AAT AAC CAG ATT ATC GAA CTG GAT |
| ICOPb | TG GAT AAC AAA GAA AAT GAG AAG CAG GCT AAA CTC AAA GAG TTT CAA CGT CGC TTC CCC AAC TAC ATG AAT GGC AAG AAA GTC ATC TTT CCA ATC ATG GAT GAA ATT ATT GTG CAA TTT TCG CAG ATC TTC CCG CAA AGC AAC CAG TTT GGC AAA ATG CGC GAA GGG AAC GTC ATT AAA ACC TTT TCG CCT ATT CCG TTA AAT CAG CAG ATT GAA ATT ACG ACC TTC ATT AAC GCG TTT CCG TAT AAC CAA CAA TTT GCA GCG ATG AGT GAT AGT CAA AAT CAG TTT CAA CTG TTG CTT TCA CCG TTG CTG AAA CTG ACT GGA CAT CTG ATT AAG GAT TAC CAC TCG AAT GCG ACG TTT TCG AAC TCC TAC CAG TAT TCC ACC TTT GAT ACA CAG GAG CAG TCT GAC CGC ATT AAC TTC AAA CTG ACG GCG TTT ATC ATT GAG GAC ATT TTC AAG TAT AAA ATG GGG TTA CTG AAA CCG ATC GAC ATT GCC AAA CAA CGT CAA GTG AAA GAC GAC ATC AAA AAG AAA GCG AAC AAA GCG CAA AAA ATC TCC TTG CTC ACC ATG GTC GAG AAA CAG CAG CAG CAA GAA GAG GAA AAA GAT GTG AAT CAG GAC TTG ACC CTG CAA TCA CAG AAG TAT GAG TTT GAG AAC TAC CTG GAT CCT ACT TGC CAG AGC TTT TGG AAG ATT GCC TAT GAG GCT TTT AAC AAA ATC ATC AAA AAG TCT CAA CGC ACT AAA TTA CAG GAT ATG GAC ATC GAA CAG GAA TCC GAT GAA CAG CCT GAT ACG ATC CAA AAC GTG AAC AAC CAG AAA GGT AAC CTG AAT CAG GAA TCA ATC GAA CTG CGT CGT CAG CAA ATC ATC AGC AAA TAC CAG CAG TTA GGT AAG CTG AAG GAT CAG AAC AAG AAA AAG AGC AAA TCT ACG AAG CAG TAC ACA CAG ATT AAA AGT TTC AAA ATC AAA GAT AAA TAC ACA GAT CTG GAG ATG CTG CGG TTC AAC AAT CTT TTC AAA TTC CTG ATC CAG AAT TGG CCA GCT ATG CTC TTG CAA TCG ATT AAA CTC CCG TAT GTA CAG TCA CTC TTT AAC GAT CAG GAA CTG CGC AAC ATT AAA AGT ATC GGC CAG AAT GAT TTA GGG TAT TTT GGC TTG AAA GCC AAA CAA CGC GCA GAT ATT ACC TCC AAT CTG ATT GAA GGT GTT CGC GAA ACC GAT AGC TTC AAG ATT ATC ATT GAG TAT CGC CAA GAA GTA ACT GAA GCC GTA GGA TTA GTG CTG GAA AAC GTT CAG GAT GAA CTG AAT TCC ATT AAT CAG GCA CTG CAG AAA AAA GAC TCT CAA TAT ACT CTG CAG CAA CAA CAG CAG TAT CGC AAG ATT TAT AAG CAG TAT CTC CAG CTG GTT GAG TTC AGT CGT CTT TTT ATT AAC GGC TGT CTG TAT CTT GGT AGC GAT ATT CAT GGC TAT GAC TAC CAC ATT TTC AGC AAT GAC ATC GAC CAC ATT TAC CAG AAC AAT GGT AGC GAA TGG CGT GTC TTG GAT GAA AAT CAA GTT CAA CAG CTG TTC AAA ACC TTA AAT GTA TGC GGC GTG AAA GAA CGC GAA CTG CAG ACG AAC ATC CAG AAA CTC ATG GCA TGT GAG CTT TTC AAT GAT CAG GAC ACC AAA GAA CTG ATT ACC ATC AAA AAT GTT GAA CAA AGC CAG GTT CAA GCC GGT AAC CGC TCT CCA AAA CAG CTG ATC GTG AAA ATT CTG CTG GAA GTA GTT CAG AAA TAC ACG GAC ACC CTG ATG ATT CGC AAA TTG CGT TGG GAA TCG TAC AAA ATT CGC GAA AAA TTC CAA AAC ACG ATT AAA ACC CTG GAA AAT CCG CTT GAC ATG GTG GAC TTC ATG AAG ATT CTG ATT GAG CAA TTC GAA ACA GCA CAG GTT CTG GTC ATT GAT CAG CAG AAA ATG CAG AAC GGC AAT CAG TAT GAC CAG AAA GAT CTG AAA GAA TTC CAG CAG CGT ATT CGG ATC TAT GAA AAC AAA TTG CAA GGC CTG AAA GAG CCC GAA AAA ATT CTG TTT TAT GAT AGC CAG CTG TTT CAG CTG ATG GAG TCT AAA GAG TAC ATC AAA CCG AAC GGT ATT AAA AGC AAT ACC AAA TTT TGG CAA CAG TCG TTG GGT GTT GAA GTC AAA GAA GCC CTG ATG AAC TTT GCG AAT AAG GTC GAC AAA GAA AAC CAA CAG TAC GAT GTG GTG TTT ATG GCT AGT ACC CTT CTT TTA GCG GTC CAG GAA TAT GAG CTG TCA AGC TCC AGT CAA GAC AAT GAA GAT GAT GAA CTG TTA CGT CAA ATC GTG AAA GAA GTG AAG TTT GAT AAT CAG AAT CTG TTA CTC AAA ACG GAT AAC CAT CAA GTG AAC AAT CAG ATC ATC GAA CTG GAT |

**Supplemental Table S10: Samples used for nucleosome density analyses**

| Sample | Reference |
| --- | --- |
| *ICOPa/b/PGM*-KD | This study |
| *ND7/PGM*-KD (control for this study) | This study |
| *ISWI1/PGM*-KD | [(Singh et al. 2022)](https://sciwheel.com/work/citation?ids=13753998&pre=&suf=&sa=0) |
| *NOWA1/2/PGM*-KD | [(Singh et al. 2022)](https://sciwheel.com/work/citation?ids=13753998&pre=&suf=&sa=0) |
| *PTCAF1/PGM*-KD | [(Wang et al. 2022)](https://sciwheel.com/work/citation?ids=13513385&pre=&suf=&sa=0) |
| *empty vector/PGM*-KD  (control for *PTCAF1/PGM*-KD & *NOWA1/2/PGM*-KD) | [(Singh et al. 2022; Wang et al. 2022)](https://sciwheel.com/work/citation?ids=13753998,13513385&pre=&pre=&suf=&suf=&sa=0,0) |
